# Supplementary material for: Surface faceting and compositional evolution of Pd@Au core–shell nanocrystals during in situ annealing
Source: Royal Society of Chemistry journal article supplement (doi:10.1039/c8cp07576j), 2019-01-01

Electronic Supplementary Material (ESI) for Physical Chemistry Chemical Physics.  
This journal is © the Owner Societies 2019

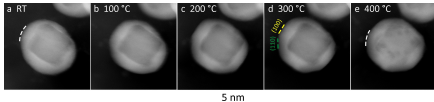

Supplement: c8cp07576j3.pdf [file c8cp07576j3.pdf]
