# Supplementary figures and images for: Surface faceting and compositional evolution of Pd@Au core–shell nanocrystals during in situ annealing
Source: Royal Society of Chemistry journal article supplement (doi:10.1039/c8cp07576j), 2019-01-01

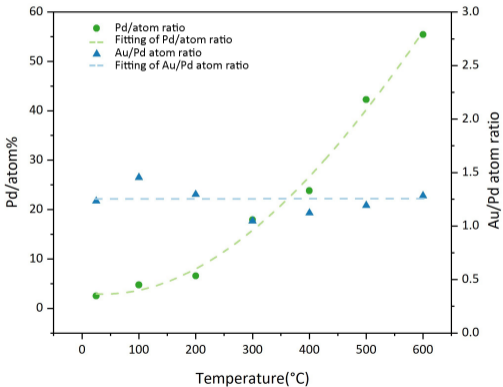

Supplement: c8cp07576j4.pdf [file c8cp07576j4.pdf]
